# Supplementary material
Source: publisher figshare collection journal article supplement (https://sage.figshare.com/ndownloader/files/27413739)
Supplement: Supplementary file 1 [file 27413739]

## Sheet: T1. Baseline Characteristics
		Total	Normal	VI only	HI only	Both VI and HI	P-value
		N=13097	N=9475	N=2022	N=877	N=723
	Age (year)						<0.001
	45-54	4909 (37.5%)	4018 (42.4%)	534 (26.4%)	246 (28.1%)	111 (15.4%)
	55-64	4981 (38.0%)	3526 (37.2%)	854 (42.2%)	337 (38.4%)	264 (36.5%)
	65-74	2358 (18.0%)	1485 (15.7%)	454 (22.5%)	201 (22.9%)	218 (30.2%)
	≥75	849 (6.5%)	446 (4.7%)	180 (8.9%)	93 (10.6%)	130 (18.0%)
	Male	6373 (48.7%)	4810 (50.8%)	761 (37.6%)	481 (54.8%)	321 (44.4%)	<0.001
	Educational Level						<0.001
	Illiterate	3243 (24.8%)	1959 (20.7%)	694 (34.3%)	257 (29.3%)	333 (46.1%)
	Part of Primary School	2381 (18.2%)	1617 (17.1%)	432 (21.4%)	163 (18.6%)	169 (23.4%)
	Primary School	2866 (21.9%)	2113 (22.3%)	412 (20.4%)	228 (26.0%)	113 (15.6%)
	Middle School	2856 (21.8%)	2308 (24.4%)	331 (16.4%)	146 (16.6%)	71 (9.8%)
	High School or Above	1750 (13.4%)	1477 (15.6%)	153 (7.6%)	83 (9.5%)	37 (5.1%)
	Married or partnered	11562 (88.3%)	8502 (89.7%)	1728 (85.5%)	758 (86.4%)	574 (79.4%)	<0.001
	Smoke						<0.001
	Current	4095 (31.3%)	3059 (32.3%)	537 (26.6%)	301 (34.3%)	198 (27.4%)
	Former	1168 (8.9%)	810 (8.5%)	169 (8.4%)	98 (11.2%)	91 (12.6%)
	Never	7833 (59.8%)	5605 (59.2%)	1316 (65.1%)	478 (54.5%)	434 (60.0%)
	Alcohol use						<0.001
	Current	4400 (33.6%)	3387 (35.8%)	535 (26.5%)	280 (31.9%)	198 (27.4%)
	Former	1065 (8.1%)	699 (7.4%)	194 (9.6%)	88 (10.0%)	84 (11.6%)
	Never	7628 (58.3%)	5386 (56.9%)	1293 (63.9%)	509 (58.0%)	440 (60.9%)
	Hypertension	3400 (26.1%)	2316 (24.5%)	608 (30.2%)	240 (27.6%)	236 (32.8%)	<0.001
	Diabetes	817 (6.3%)	513 (5.5%)	192 (9.6%)	58 (6.7%)	54 (7.5%)	<0.001

## Sheet: T2. Main Results
		Immediate WR	Delayed WR	Global WR
	Cross-sectional Difference
	Normal	Reference
	VI only	-0.10	-0.08	-0.09
		[-0.14,-0.05]	[-0.12,-0.04]	[-0.13,-0.05]
	HI only	-0.07	-0.10	-0.09
		[-0.13,-0.01]	[-0.16,-0.04]	[-0.15,-0.03]
	Both VI and HI	-0.17	-0.17	-0.18
		[-0.24,-0.11]	[-0.24,-0.10]	[-0.24,-0.11]
	Longitudinal Difference at Two Years
	Normal	Reference
	VI only	-0.00	-0.05	-0.03
		[-0.07,0.06]	[-0.11,0.01]	[-0.09,0.03]
	HI only	-0.04	-0.07	-0.06
		[-0.12,0.05]	[-0.16,0.01]	[-0.15,0.02]
	Both VI and HI	-0.07	-0.08	-0.07
		[-0.16,0.03]	[-0.17,0.01]	[-0.16,0.02]
	Longitudinal Difference at Four Years
	Normal	Reference
	VI only	-0.02	-0.04	-0.03
		[-0.08,0.04]	[-0.10,0.03]	[-0.09,0.03]
	HI only	-0.14	-0.07	-0.11
		[-0.22,-0.05]	[-0.16,0.02]	[-0.20,-0.03]
	Both VI and HI	-0.14	-0.05	-0.10
		[-0.23,-0.04]	[-0.14,0.05]	[-0.19,-0.00]
	N	33708	33666	33537
	Note: VI=Visual impairment; HL=Hearing loss
	95% confidence intervals in brackets
	Models adjusted results for covariates of age, gender, educaiton, marriage statu, smoke, alcohol use, hypertension, diabetes.

## Sheet: T3. by Age
		45 <= Age < 60				Age >= 60
		Immediate WR	Delayed WR	Global WR		Immediate WR	Delayed WR	Global WR
	Cross-sectional Difference
	Normal	Reference				Reference
	VI only	-0.14	-0.14	-0.15		-0.08	-0.05	-0.07
		[-0.20,-0.08]	[-0.20,-0.08]	[-0.21,-0.09]		[-0.14,-0.02]	[-0.11,0.01]	[-0.12,-0.01]
	HI only	-0.08	-0.14	-0.12		-0.08	-0.08	-0.09
		[-0.17,0.01]	[-0.23,-0.05]	[-0.20,-0.03]		[-0.17,0.00]	[-0.16,0.01]	[-0.17,-0.00]
	Both VI and HI	-0.24	-0.22	-0.24		-0.16	-0.16	-0.17
		[-0.35,-0.13]	[-0.34,-0.10]	[-0.35,-0.13]		[-0.24,-0.07]	[-0.25,-0.08]	[-0.25,-0.09]
	Longitudinal Difference at Two Years
	Normal	Reference				Reference
	VI only	0.07	0.04	0.06		-0.05	-0.11	-0.09
		[-0.02,0.15]	[-0.05,0.13]	[-0.03,0.14]		[-0.14,0.04]	[-0.20,-0.02]	[-0.18,-0.01]
	HI only	-0.01	0.01	-0.01		-0.05	-0.12	-0.09
		[-0.14,0.11]	[-0.12,0.13]	[-0.13,0.12]		[-0.17,0.07]	[-0.24,-0.00]	[-0.21,0.03]
	Both VI and HI	0.05	0.03	0.05		-0.11	-0.11	-0.11
		[-0.10,0.21]	[-0.13,0.19]	[-0.11,0.20]		[-0.23,0.00]	[-0.23,0.01]	[-0.22,0.00]
	Longitudinal Difference at Four Years
	Normal	Reference				Reference
	VI only	0.03	0.01	0.02		-0.01	-0.03	-0.03
		[-0.05,0.11]	[-0.08,0.10]	[-0.06,0.10]		[-0.11,0.08]	[-0.12,0.06]	[-0.11,0.06]
	HI only	-0.05	0.06	-0.00		-0.14	-0.14	-0.15
		[-0.18,0.07]	[-0.07,0.19]	[-0.13,0.13]		[-0.27,-0.02]	[-0.26,-0.02]	[-0.28,-0.03]
	Both VI and HI	0.03	0.06	0.05		-0.17	-0.05	-0.11
		[-0.12,0.19]	[-0.10,0.22]	[-0.10,0.20]		[-0.29,-0.05]	[-0.17,0.07]	[-0.23,0.01]
	N	19930	19891	19842		13778	13775	13695

## Sheet: T4. by Gender
		Female				Male
		Immediate WR	Delayed WR	Global WR		Immediate WR	Delayed WR	Global WR
	Cross-sectional Difference
	Normal	Reference				Reference
	VI only	-0.09	-0.07	-0.08		-0.10	-0.09	-0.10
		[-0.15,-0.04]	[-0.13,-0.01]	[-0.14,-0.03]		[-0.17,-0.03]	[-0.16,-0.03]	[-0.16,-0.03]
	HI only	-0.09	-0.10	-0.10		-0.06	-0.09	-0.08
		[-0.19,-0.00]	[-0.20,-0.01]	[-0.19,-0.01]		[-0.14,0.03]	[-0.18,-0.01]	[-0.16,0.00]
	Both VI and HI	-0.15	-0.15	-0.16		-0.21	-0.19	-0.21
		[-0.24,-0.05]	[-0.24,-0.06]	[-0.25,-0.07]		[-0.30,-0.11]	[-0.29,-0.09]	[-0.30,-0.11]
	Longitudinal Difference at Two Years
	Normal	Reference				Reference
	VI only	0.02	-0.05	-0.02		-0.03	-0.04	-0.05
		[-0.06,0.10]	[-0.13,0.03]	[-0.10,0.06]		[-0.13,0.06]	[-0.14,0.06]	[-0.14,0.05]
	HI only	-0.02	-0.08	-0.06		-0.05	-0.08	-0.06
		[-0.15,0.11]	[-0.21,0.06]	[-0.18,0.07]		[-0.17,0.06]	[-0.19,0.04]	[-0.18,0.05]
	Both VI and HI	-0.08	-0.07	-0.08		-0.05	-0.09	-0.06
		[-0.20,0.05]	[-0.20,0.06]	[-0.20,0.05]		[-0.19,0.09]	[-0.23,0.05]	[-0.19,0.08]
	Longitudinal Difference at Four Years
	Normal	Reference				Reference
	VI only	-0.04	-0.04	-0.05		-0.01	-0.04	-0.03
		[-0.13,0.04]	[-0.13,0.04]	[-0.13,0.03]		[-0.11,0.08]	[-0.13,0.06]	[-0.12,0.06]
	HI only	-0.15	-0.02	-0.09		-0.12	-0.11	-0.13
		[-0.29,-0.01]	[-0.16,0.11]	[-0.22,0.04]		[-0.24,-0.00]	[-0.23,0.01]	[-0.24,-0.01]
	Both VI and HI	-0.17	-0.04	-0.10		-0.11	-0.07	-0.10
		[-0.30,-0.04]	[-0.17,0.09]	[-0.23,0.02]		[-0.25,0.03]	[-0.22,0.07]	[-0.24,0.04]
	N	17344	17315	17243		16364	16351	16294

## Sheet: AT1. Complete cases
		Immediate Word Recall	Delayed Word Recall	Global Word Recall
	Cross-sectional Difference
	Normal	Reference
	VI only	-0.08	-0.07	-0.08
		[-0.13,-0.04]	[-0.12,-0.03]	[-0.13,-0.03]
	HI only	-0.06	-0.10	-0.08
		[-0.13,0.01]	[-0.17,-0.03]	[-0.15,-0.02]
	Both VI and HI	-0.15	-0.16	-0.16
		[-0.23,-0.08]	[-0.24,-0.09]	[-0.24,-0.09]
	Longitudinal Difference at Two Years
	Normal	Reference
	VI only	-0.02	-0.06	-0.04
		[-0.08,0.05]	[-0.12,0.01]	[-0.11,0.02]
	HI only	-0.03	-0.05	-0.04
		[-0.12,0.06]	[-0.14,0.05]	[-0.13,0.05]
	Both VI and HI	-0.07	-0.08	-0.08
		[-0.17,0.02]	[-0.18,0.02]	[-0.18,0.01]
	Longitudinal Difference at Four Years
	Normal	Reference
	VI only	-0.03	-0.05	-0.05
		[-0.10,0.04]	[-0.12,0.02]	[-0.11,0.02]
	HI only	-0.16	-0.09	-0.14
		[-0.26,-0.07]	[-0.18,0.01]	[-0.23,-0.04]
	Both VI and HI	-0.15	-0.06	-0.11
		[-0.25,-0.05]	[-0.16,0.04]	[-0.20,-0.01]
	N	29551	29511	29395
	Note: VI=Visual impairment; HL=Hearing loss
	95% confidence intervals in brackets
	Models adjusted results for covariates of age, gender, educaiton, marriage statu, smoke, alcohol use, hypertension, diabetes.

## Sheet: AT2.Drop Catract
		Immediate WR	Delayed WR	Global WR
	Cross-sectional Difference
	Normal	Reference
	VI only	-0.11	-0.09	-0.11
		[-0.15,-0.07]	[-0.14,-0.05]	[-0.15,-0.06]
	HI only	-0.08	-0.1	-0.09
		[-0.14,-0.01]	[-0.16,-0.04]	[-0.15,-0.03]
	Both VI and HI	-0.17	-0.17	-0.18
		[-0.24,-0.10]	[-0.24,-0.10]	[-0.25,-0.11]
	Longitudinal Difference at Two Years
	Normal	Reference
	VI only	0.01	-0.04	-0.02
		[-0.06,0.07]	[-0.10,0.02]	[-0.08,0.04]
	HI only	-0.04	-0.07	-0.06
		[-0.12,0.05]	[-0.16,0.02]	[-0.14,0.03]
	Both VI and HI	-0.07	-0.08	-0.07
		[-0.16,0.03]	[-0.17,0.02]	[-0.16,0.02]
	Longitudinal Difference at Four Years
	Normal	Reference
	VI only	-0.01	-0.02	-0.02
		[-0.07,0.05]	[-0.09,0.04]	[-0.08,0.04]
	HI only	-0.13	-0.07	-0.11
		[-0.22,-0.04]	[-0.17,0.02]	[-0.20,-0.02]
	Both VI and HI	-0.14	-0.05	-0.1
		[-0.23,-0.04]	[-0.14,0.05]	[-0.19,-0.00]
	N	33151	33112	32987
	Note: VI=Visual impairment; HL=Hearing loss
	95% confidence intervals in brackets
	Models adjusted results for covariates of age, gender, educaiton, marriage statu, smoke, alcohol use, hypertension, diabetes.
	Appendix Table 2. Sensitivity Analysis Without Cases Having Cataract Surgeries

## Sheet: AT3.Drop Eyeglasses Wearers
		Immediate WR	Delayed WR	Global WR
	Cross-sectional Difference
	Normal	Reference
	VI only	-0.09	-0.08	-0.09
		[-0.14,-0.05]	[-0.12,-0.03]	[-0.13,-0.04]
	HI only	-0.07	-0.1	-0.09
		[-0.13,-0.00]	[-0.16,-0.03]	[-0.15,-0.02]
	Both VI and HI	-0.17	-0.17	-0.18
		[-0.24,-0.10]	[-0.24,-0.10]	[-0.25,-0.11]
	Longitudinal Difference at Two Years
	Normal	Reference
	VI only	0.01	-0.05	-0.03
		[-0.06,0.07]	[-0.11,0.02]	[-0.09,0.04]
	HI only	-0.03	-0.06	-0.05
		[-0.12,0.06]	[-0.16,0.03]	[-0.14,0.04]
	Both VI and HI	-0.07	-0.08	-0.08
		[-0.17,0.03]	[-0.18,0.02]	[-0.17,0.02]
	Longitudinal Difference at Four Years
	Normal	Reference
	VI only	-0.02	-0.04	-0.04
		[-0.09,0.04]	[-0.11,0.02]	[-0.10,0.03]
	HI only	-0.14	-0.07	-0.12
		[-0.23,-0.05]	[-0.17,0.02]	[-0.21,-0.03]
	Both VI and HI	-0.15	-0.05	-0.11
		[-0.25,-0.05]	[-0.15,0.04]	[-0.20,-0.01]
	N	31422	31376	31251
	Note: VI=Visual impairment; HL=Hearing loss
	95% confidence intervals in brackets
	Models adjusted results for covariates of age, gender, educaiton, marriage statu, smoke, alcohol use, hypertension, diabetes.
	Appendix Table 3. Sensitivity Analysis Without Cases Having Weared Eyeglasses
